# Supplementary material for: Genetic diversity analysis for wild and cultivated accessions of Cymbopogon citratus (D.C.) Stapf using phytochemical and molecular markers
Source: PeerJ. 2022 Jun 29;10:e13505. doi: 10.7717/peerj.13505 (PMC9250312; doi:10.7717/peerj.13505)
Supplement: Supplemental Information 1 [file peerj-10-13505-s001.xlsx]

## Sheet: sheet 1
			Compounds Name
Accession Number	Location	Source	a-Pinene	5-Hepten-2-one,6-methyl-	Neral	Verbenol	Citral	Geranial	Thymol	Geranyl acetate	Farnesene	Verbenone	Caryophyllene	Selina-6-en-4-ol	Cadinol	Linalool	trans-Geranylgeraniol	Limonene	Toluene	Globulol	Humulene	Methyleugenol	Citronellal	Neric acid	2-Tridecanone	Elsholtzia ketone	n-Hexadecanoic acid	Phytol	Methyl Camphorsulfonates
38452	Alipur Chatha	Wild	7.13	1.55	0	5.03	6.73	0	0.08	4.84	0.38	0	2.67	0	0	1.15	0.53	5.67	0	2.09	0.42	0	0	0	0	0.43	0	0	0
38453	Gujranwalla	Wild	7.38	3.59	0.34	13.68	17.62	0	0.76	3.42	0	0	0.54	0	0	0	0.34	0	8.36	0	0	0	0	0	0	0	0	1.23	0
38454	Dhaka	Cultivated	0	3.23	0.23	0	19.62	0	0.32	3.26	0	0	1	0.89	0	0	1	0	7.65	0	0	0	0	0	0	0	0	0	0
38455	Sheikhupura	Cultivated	7.19	5.41	0	0	12.04	5.04	0	0.87	0	14.37	1.26	1.19	0	3.99	1	1.85	0	0	0	0	0.93	1.48	0.48	0.51	0.62	0	0
38456	USA (Virgin Island)	Cultivated	12.44	0.67	1.34	0.22	27.71	2.32	0	1.17	0.23	0.94	0.64	0.63	0	0.33	1.22	1.22	1.23	0	0.31	0	0	0.24	0.39	0	0.82	0	0.72
38457	Khairpur	Wild	15.5	0.81	0	0	9.42	0.07	0	0.78	0	0	0	0	0.67	0	0.98	0	2.1	0	0	0	0	0	0	0	0	1.43	2.23
38459	Phalia	Cultivated	0	1.73	0	1.23	8.82	0	0	0	0	0.84	4.75	1.6	0	3.81	0	0	0	0	0	0	0	0	0.84	0	0	0	0
384510	Kunja	Wild	3.71	0.87	0	9.73	2.73	0	0	1.83	0	0	0	1.79	0	3.86	0.67	2.43	0	5.3	0	0	0	2.23	3.17	0	0	0	3.72
384511	Model town Lahore	Cultivated	0.82	0	1.23	0	15.09	0	0.34	2.34	0.12	0	1.22	0	0.44	0	0	0	5.45	0	0	0	0	0	0	0.06	0	0	1.12
384512	Amritsar	Cultivated	0	2.13	0.09	0	13.27	0	1.06	1.35	0.08	0	0	0	0	0	0	1	0	0	0	0	0	0	0	0	0	0	0
384513	Pattoki	Wild	7.53	2.97	0	3.02	8.71	3.83	0	0.37	0	0	1.23	0.34	0	4.26	1.34	4.37	0.98	0	0	0	6.46	0	0	0	0.63	0	0
384514	Pattoki	Cultivated	8.42	0.76	12.58	0.89	11.23	0.18	0	0	0.06	0	0	0.62	0	0.36	0	0	0	0	0.08	0	0	0	0	0	0	0	0
384515	Halla	Wild	0	0.85	0	0.77	15.92	0.76	0	0.24	0	0	0	0.09	0	2.34	0	0	0	0	0	0	0	0	0	0.09	0	0	0
384516	Manawala(Faisalabad)	Wild	5.36	0.34	0	11.36	16.79	0	0.98	1.23	0.88	3.45	7.29	1.02	0	1.06	0	1.23	0	0	0	0	0	0	0	0	0.07	0	0
384518	Faisalabad	Cultivated	6.31	0.05	0.95	1.23	19.24	0	1.08	2.97	0.97	13.2	1.48	1.3	0.46	3.08	0.37	0.84	7.57	0.28	0	11.19	0.58	0	0	0	0	0	0
384519	Bani Gala (Islamabad)	Wild	4.91	1.02	0	13.92	15.22	0	0.34	4.32	0.31	0.58	1.09	0.24	0.85	0	0.32	2.47	8.34	0	0	0	0	0	0	0	0.43	0	0
384520	Islamabad	Cultivated	5.3	2.61	0.33	20.25	12.09	0	0.21	3.32	0	1.34	0.34	0	0	0	0.44	6	0	0	0	0	0	0	0	1.03	0	1.64	0
384521	Bahawalpur	Wild	9.15	0.67	0	11.27	15.09	0	0	0	0	0	0	0.32	0	0	0	0.09	0	0	0	0	0	0	0	0	0	0	0
384522	Sargodha	Cultivated	0	0.98	6.34	0	14.43	0	0.07	1.54	0	0	0.66	0	0	0	0.14	0	0	0	0	0	0	0	0	0	0	0	0
384523	Pindi	Wild	2.37	3.35	0	0	1.92	0	0	2.4	0.89	2.08	1.58	0	0	2.41	0	2.36	0.08	0.97	0	3.01	0.88	0	0	1.19	0	0	1.65
384524	Peshawar	Cultivated	3.35	2.71	0	15.77	7.06	0	0	4.37	0	0	0	0.71	0	5.65	0.54	0	0	0	0.42	0	1.02	0.47	0	0	0	0	0.69
384526	Multan	Cultivated	10.14	4.43	1.23	22.84	23.87	0	0	0.49	0	0	0.87	0.18	0	0.14	0	0	0	0	0.09	0	0	0.13	0	0	0.05	0	1.32
384527	Hafizabad	Cultivated	3.7	1.23	0	2.23	27.52	0	0.67	15.69	1.65	0	0.64	0	2.56	0	1.22	2.12	0.56	0.35	0	0.87	0	0	0	0	0	0	0
384528	Hafizabad(Jalalpur Bhattian)	Wild	2.1	1.02	0	0	23.43	0	0	3.42	0	0	0	0	0	3.09	0	0	0	2.34	0	0	0.68	0	1.02	0	0	0	0
384529	Karachi University	Cultivated	12.34	2.98	0	0.97	17.72	0	0	0.98	0	0	0,86	0	0	0	0	2.13	0	0	0	0	0	0	0	0	0	0	0
384530	Karachi	Wild	14.49	3.52	21.31	0	17.31	3.84	0	0	0	0	0.45	0	0.14	0	0	3.45	0	0	0	0	0	0	0	0	0	0	0
384531	Karachi	Wild	10.02	4.42	0	0	14.76	0	1.02	0	0	4.67	0	0.56	0	0	1.27	0	1.22	0	1.08	10.98	0	0	0	0	0	0	0
384532	Phull Karachi	Cultivated	10.32	2.06	0	2.89	16.21	0	0.36	0.76	0	0	0	0	0	2.34	0	0	0	0	1.12	0	0	0	0	0.07	0	0	0
384533	Shakarghar	Wild	1.09	1.49	0	9.36	9.8	0	0.98	1.69	0	0	1.47	0	0	1.25	0.56	0	0	0	0	1.33	0	2.25	0	0	0.82	3.25	4.73
384534	Kashmir	Cultivated	0	1.67	0	0.76	12.06	0.56	0	0	0.09	3.24	1.23	0	0	0	0	3.56	0	0	0	0	0.05	0	0	0	0	0	0
384535	Kashmir	Cultivated	0	0	0	0	11.81	0.76	0.65	6.15	0	0	0.98	0.19	0	0	0	0	0	0	0	0	0	10.93	0	0	0	0	2.12
384536	Bahawalnagar	Wild	1.2	0	1.56	0.88	8.96	0	0.45	0.07	0	0	0	0	0	3.45	0.43	0	0	0.83	0	0	0	0	1.32	0	0	0	0
384538	Kamoki	Cultivated	2.3	0	0.67	0	8.65	0.54	0	2.67	0	0.87	0	0	0.05	4.45	0	1.45	0	0	0	0	0	0	0	0	0	0.78	0
384540	Jhelum	Wild	0	1.76	0	2.34	22.41	0	0	0	0	0	0	0	0	0	0	2.34	0	0	0	4.32	0	0	0	0	0	0	0
384541	Daska	Cultivated	9.56	2.13	0	2.37	27.74	0	1.08	0.22	0	0	0	0.41	0	0.34	0	0	0.16	0	0	0	0	0	0.09	0	0	0	0
384542	Daska	Wild	10.57	1.89	0	0	22.45	0	0.08	0	0	0	0	0.06	0	0	2.34	0	0	0	0.07	0	0	0	0	0.08	0	0	0
384543	Dera Ismail Khan	Wild	3.4	0.98	0	3.78	24.7	0	0.21	0	0	0	0	0.05	0	0	0	1.87	0	0	0	0	0	0	0	0	0	0	0
384544	Dera Ismail Khan	Cultivated	2.4	0.66	0	0	21.31	0	0.46	0.99	1.02	0	0.36	0	0	2.34	0	0	0	0	0	0.65	0	0	0	0	0	0	0
384545	Pindi	Wild	3.4	1.99	0	0	2.18	0	0	1.23	0.08	2.43	0	0	1.23	0	1.47	0	0	1.24	0	0	0	0	0	0	0	0.08	0
384550	Bannu	Wild	0	2.15	0	3.23	3.42	0.34	0	0	0.05	0	0.07	2.34	0	1.45	0	2.12	0	0	0	0	0.71	0	0	0	0	1.07	0
